# Supplementary material
Source: publisher site journal article supplement (https://www.dovepress.com/article/421087)
Supplement: Supplementary file 1 [file get_supplementary_file.php]

**المتنبئات والوعي بشأن استخدام الأدوية بين النساء الحوامل في مدينة الرياض**

**يقوم الباحث بإعداد دراسة بعنوان "المتنبئات والوعي بشأن استخدام الأدوية التي تستلزم والتي لا تستلزم وصفة طبية بين النساء الحوامل" وستهدف الدراسة أيضا إلى قياس المؤشرات و الوعي لاستخدام الادوية بدون وصفة طبية بين النساء الحوامل.**

**تتكون الاستبانة من اربع اجزاء , الجزء الاول بيانات اولية و التاريخ المرضي , الجزء الثاني هو لمعرفة الأدوية المستخدمة أثناء الحمل ,الجزء الثالث هو لقياس الوعي نحو استخدام الدواء أثناء الحمل , و الرابع لمعرفه مصادر المعلومات, راجية منكم التاكد من اتمام الاستبانة.**

**عزيزتي ان مشاركتك في هذه الدراسة طوعية و لك الحق في عدم قبول تعبئة الاستبانة علما ان البيانات المقدمة من قبلك لها سريتها التامة و لغرض البحث العلمي فقط مع خالص الشكر و الامتنان.**

**الخصائص الاجتماعية - الديمغرافية والمتصلة بالصحة**

1. **العمر (سنوات):** .....................................................................
2. **الجنسية :** □ سعودية □ غير سعودية
3. **الحالة الاجتماعية :** □ متزوجة □ منفصلة, مطلقة, ارملة
4. **المستوى التعليمي :** □ مدرسة ابتدائية/متوسطة □ مدرسة ثانوية □ جامعة أو كلية
5. **المهنة :** **□** ربة منزل □ موظفة
6. **العنوان: □** مدينة □ **قرية/هجرة**
7. **مرات الحمل السابقة:** (أرقام) **......................................................**
8. **عدد الولادات السابقة:** (أرقام) .....................................................
9. في أي أسبوع من أسابيع الحمل أنت؟ **(أسابيع الحمل) ...........................**
10. **تاريخ مرضي سابق** (مسموح بأكثر من إجابة واحدة)

- الاجهاض
- ولادة جنين ميت
- طفل خديج
- وفاة الجنين داخل الرحم
- لا يوجد تاريخ مرضي

1. **هل لديك أي مشكلة طبية؟** □ نعم □ لا *(اذكريها)* ...............................

**الأدوية المستخدمة أثناء الحمل**

1. **هل سبق لك أن استخدمت أي دواء خلال هذا الحمل؟**

□ لا □ نعم

**الأدوية المستخدمة أثناء الحمل**

1. **إذا كان الجواب نعم. كيف حصلت على هذه الادوية؟**

- وصفه الطبيب
- حصلت علية مباشرة من الصيدلية (أستشاره صيدلاني)
- آخرى ...........................................................

1. **هل تتناولين أدوية أثناء الحمل بدون وصفة طبية من الطبيب؟**

- نعم
- لا
- أحيانا

1. **لماذا استخدمت أدوية بدون وصفة طبية من طبيب؟** **(مسموح بأكثر من إجابة واحدة)**

- كان المرض خفيفاً جداً
- توفر وصفة طبية قديمة
- المشورة/ المعلومات من قبل الصيادلة
- حالة طوارئ
- الطبيب لم يكن متوفراً
- الطبيب لم يصفها

1. **ما نوع الأدوية التي تستخدمينها عادةً بدون وصفة طبية؟ (مسموح بأكثر من إجابة واحدة)**

- **المضادات الحيوية**
- **مضاد للقىء**
- **المسكنات**
- **مضاد للربو**
- **ادوية الصرع**
- **خافض للضغط**
- **أدوية السعال والبرد**
- **ملينات البراز( للإمساك)**
- **أخرى ……………………………......…**

**الوعي نحو استخدام الدواء أثناء الحمل**

1. **يمكن استخدام الأدوية غير الموصوفة أثناء الحمل؟**  (مسموح بأكثر من إجابة واحدة)

- نعم، لديهم آثار جانبية أقل
- نعم، يجب على الصيدلي تقديم جميع النصائح والمعلومات اللازمة
- لا، فهي قد تكون ضارة
- لا، نصيحة الطبيب ضرورية
- أخرى (تحديد) **……………………………...**

**الوعي نحو استخدام الدواء أثناء الحمل**

1. في أي مرحلة منمراحل الحمل يكون استخدام الدواء اكثر خطورة ؟

- لا، أبدا
- فقط في الأشهر الثلاثة الأولى
- فقط في (الشهر الرابع-السادس)
- فقط في (الشهر السابع-التاسع)
- يمكن في أي وقت من الحمل
- لا أعلم

1. **ما هي الآثار المحتملة لاستخدام الأدوية أثناء الحمل للطفل الذي لم يولد بعد؟**

|  | نعم | لا | لا أعرف |
| --- | --- | --- | --- |
| تأخر نمو الجنين |  |  |  |
| الوفاة داخل الرحم |  |  |  |
| تشوهات الكروموسومات (التشوهات الوراثيه) |  |  |  |
| التشوهات الخلقية |  |  |  |
| أخرى (تحديد) **……………………………...** |  |  |  |

1. **ما هي الآثار المحتملة لاستخدام الأدوية أثناء الحمل للمرأة؟**

|  | نعم | لا | لا أعرف |
| --- | --- | --- | --- |
| الاجهاض |  |  |  |
| انقباضات الرحم |  |  |  |
| النزيف |  |  |  |
| اكتئاب ما بعد الولادة |  |  |  |
| فقدان الذاكرة |  |  |  |
| أخرى (تحديد) **……………………………...** |  |  |  |

**مصادر المعلومات**

1. **من أي مصادر تلقيت معلومات عن الأدوية في الحمل؟** (أكثر من إجابة إذا كان ذلك ممكناً)

- الاطباء
- القابلات
- الصيادله
- الانترنت
- التلفزيون
- صحف
- أخرى (تحديد) **……………………………...**

**مصادر المعلومات**

1. **هل سبق لك أن تلقيت معلومات من طبيب حول المخاطر الصحية المحتملة للطفل الذي لم يولد**

**بعد بسبب الأدوية المستخدمة في الحمل؟**

- نعم
- لا
- أحيانا

1. **هل تقرأ عادةً نشرة المعلومات الخاصة بالأدوية التي تستخدمها؟**

- نعم
- لا
- أحيانا

1. **هل تشعر أنك بحاجة إلى مزيد من المعلومات حول استخدام الأدوية في الحمل؟**

- نعم
- لا
